# Supplementary material
Source: Royal Society of Chemistry journal article supplement (doi:10.1039/d6tb00602g)
Supplement: d6tb00602g1.pdf [file d6tb00602g1.pdf]

## Network Modulation Enables 3D-Printed Citrate-Based Polymer Scaffolds with Broadly Tunable Mechanical Performance for Regenerative Engineering

Ni Chen, Nolan Schlessman, Rao Fu, Yonghui Ding\*

Department of Biomedical Engineering, Worcester Polytechnic Institute, Worcester MA 01609

E-mail address: [yding7@wpi.edu](mailto:yding7@wpi.edu)

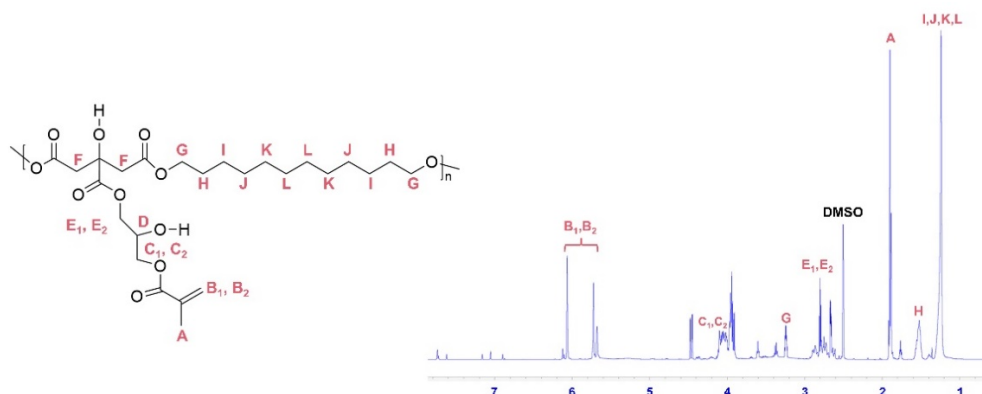

**Figure S1.** Chemical structure and NMR characterization of synthesized mPDC.

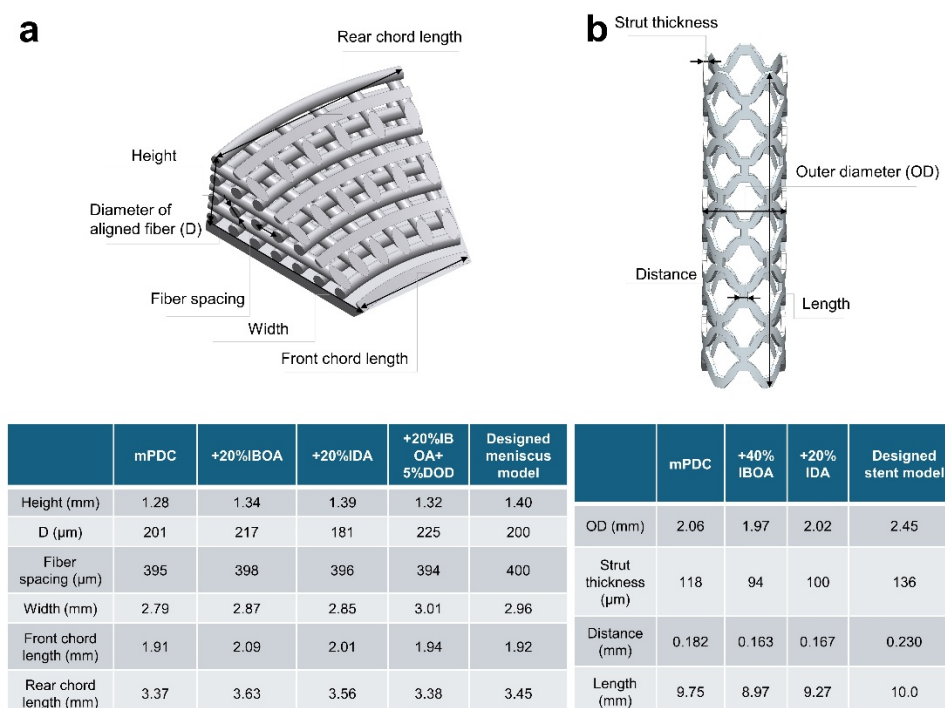

**Figure S2.** CAD models and comparison between designed and actual dimensions of (a) meniscus scaffold and (b) vascular stent.

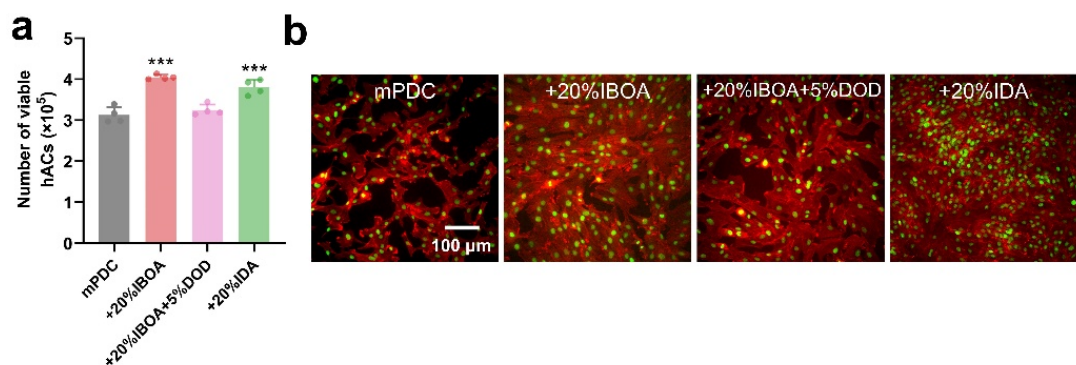

**Figure S3.** Cytocompatibility evaluation of hACs cultured on photopolymerized mPDC composites. (a) Number of viable cells (n=4) and (b) representative morphologies of hACs directly seeded and grown on mPDC composite surfaces, visualized by F-actin/Nuclei staining.

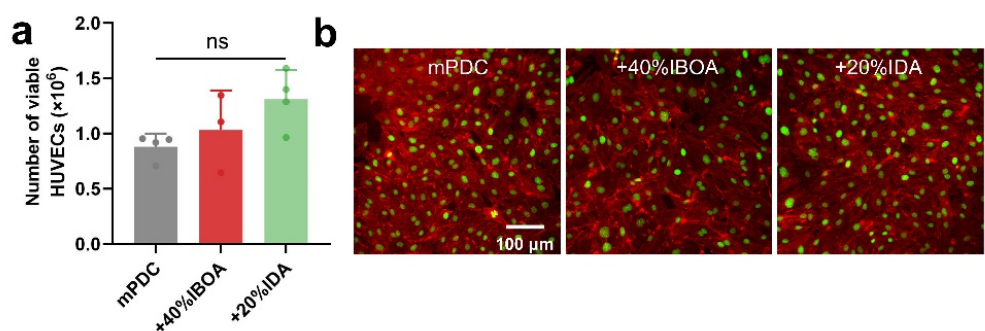

**Figure S4.** Cytocompatibility evaluation of HUVECs cultured on the photopolymerized mPDC composites. ((a) Number of viable cells (n=4) and (b) representative morphologies of HUVECs directly seeded and grown on mPDC composite surfaces, visualized by F-actin/Nuclei staining.

**Table S1.** Formulations of photopolymerizable mPDC composite inks for 3D printing.

| mPDC composite Inks    | mPDC (wt%) | RDs (wt%) | DOD (wt%) | Irgacure® 819 (wt%) | Absolute ethanol (wt%) |
|------------------------|------------|-----------|-----------|---------------------|------------------------|
| mPDC                   | 50         | 0         | 0         | 2.2                 | 47.8                   |
| +20% IBOA              | 50         | 20        | 0         | 2.2                 | 27.8                   |
| +40% IBOA <sup>a</sup> | 50         | 40        | 0         | 2.2                 | 7.8                    |
| +20% IDA               | 50         | 20        | 0         | 2.2                 | 27.8                   |
| +32% IDA <sup>a</sup>  | 50         | 32        | 0         | 2.2                 | 15.8                   |
| +12.5% BTA             | 50         | 12.5      | 0         | 2.2                 | 35.3                   |
| +25% BTA               | 50         | 25        | 0         | 2.2                 | 22.8                   |

|                 |    |      |     |     |      |
|-----------------|----|------|-----|-----|------|
| +2.5%DOD        | 50 | 0    | 2.5 | 2.2 | 45.3 |
| +5%DOD          | 50 | 0    | 5   | 2.2 | 42.8 |
| +20% IBOA+5%DOD | 50 | 20   | 5   | 2.2 | 22.8 |
| pristine IBOA   | 0  | 97.8 | 0   | 2.2 | 0    |
| pristine IDA    | 0  | 97.8 | 0   | 2.2 | 0    |
| pristine BTA    | 0  | 97.8 | 0   | 2.2 | 0    |

a: 40 wt% IBOA and 32 wt% IDA represent the practical upper limits to ensure a homogeneous and stable ink mixture.

**Table S2.** Thermal properties of the photopolymerized mPDC, homopolymerized RD, mPDC+RD composites and mPDC+DOD composites.

| Thermal property | mPDC  | poly(IBOA) | poly(IDA) | poly(BTA) | mPDC+20% IBOA | mPDC+20% IDA | mPDC+12.5% BTA | mPDC+2.5%DOD | mPDC+5%DOD |
|------------------|-------|------------|-----------|-----------|---------------|--------------|----------------|--------------|------------|
| $T_d$ (°C)       | 259.1 | 266.1      | 350.6     | 346.0     | 265.7         | 273.9        | 260.9          | 256.3        | 256.9      |
| $T_g$ (°C)       | -3.4  | 31.5       | -57.7     | -48.8     | 20.9          | -18.9        | -5.6           | -4.6         | -9.4       |

**Table S3.** Young's modulus, strain at break, and ultimate tensile strengths via tensile tests of photopolymerized mPDC composites.

| mPDC composites | Young's modulus (%) | Strain at break (%) | Ultimate tensile strength (%) |
|-----------------|---------------------|---------------------|-------------------------------|
| mPDC            | 14.0±2.5            | 14.2±3.6            | 1.8±0.3                       |
| +20% IBOA       | 50.1±7.9            | 39.4±9.9            | 6.8±1.4                       |
| +40% IBOA       | 133.5±24.5          | 27.0±3.0            | 18.3±1.7                      |
| +20% IDA        | 49.0±3.4            | 35.3±6.5            | 7.1±1.5                       |
| +32% IDA        | 42.8±5.8            | 30.5±4.9            | 6.5±1.0                       |
| +12.5% BTA      | 18.9±2.1            | 39.0±7.1            | 4.5±0.6                       |
| +25% BTA        | 28.6±2.4            | 42.4±8.5            | 6.5±1.0                       |
| +2.5%DOD        | 11.9±1.7            | 42.5±3.2            | 3.8±0.6                       |
| +5%DOD          | 6.9±0.8             | 43.5±4.2            | 2.8±0.3                       |
| +20% IBOA+5%DOD | 10.6±1.4            | 60.6±10.1           | 4.0±1.1                       |

**Table S4.** 3D-printing parameters for photopolymerizable mPDC composite inks.

| mPDC composite inks | Power intensity | Exposure time (s) | Layer thickness (μm) | CAD model |
|---------------------|-----------------|-------------------|----------------------|-----------|
|---------------------|-----------------|-------------------|----------------------|-----------|

|                 |       |      |   |          |
|-----------------|-------|------|---|----------|
| mPDC            | 1.4   | 0.62 | 5 | meniscus |
| +20% IBOA       | 0.5   | 0.62 | 5 | meniscus |
| +20% IDA        | 1.4   | 0.62 | 5 | meniscus |
| +20% IBOA+5%DOD | 0.5   | 0.62 | 5 | meniscus |
| mPDC            | 0.6   | 0.33 | 5 | stent    |
| +40% IBOA       | 0.313 | 0.28 | 5 | stent    |
| +20% IDA        | 0.5   | 0.3  | 5 | stent    |
